# Supplementary material for: High-throughput Agrobacterium-mediated barley transformation
Source: Springer Nature journal article supplement (doi:10.1186/1746-4811-4-22), 2008-09-26

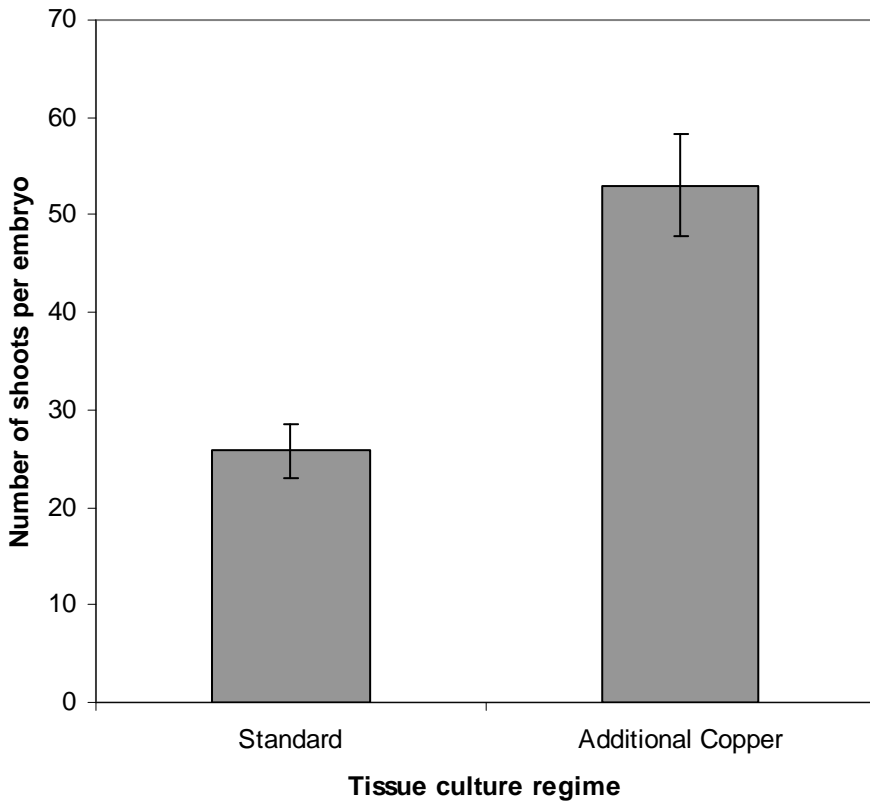

Supplement: 13007_2008_69_MOESM3_ESM.pdf [file 13007_2008_69_MOESM3_ESM.pdf]
