# Supplementary material for: High-throughput Agrobacterium-mediated barley transformation
Source: Springer Nature journal article supplement (doi:10.1186/1746-4811-4-22), 2008-09-26
Supplement: 13007_2008_69_MOESM5_ESM.pdf [file 13007_2008_69_MOESM5_ESM.pdf]

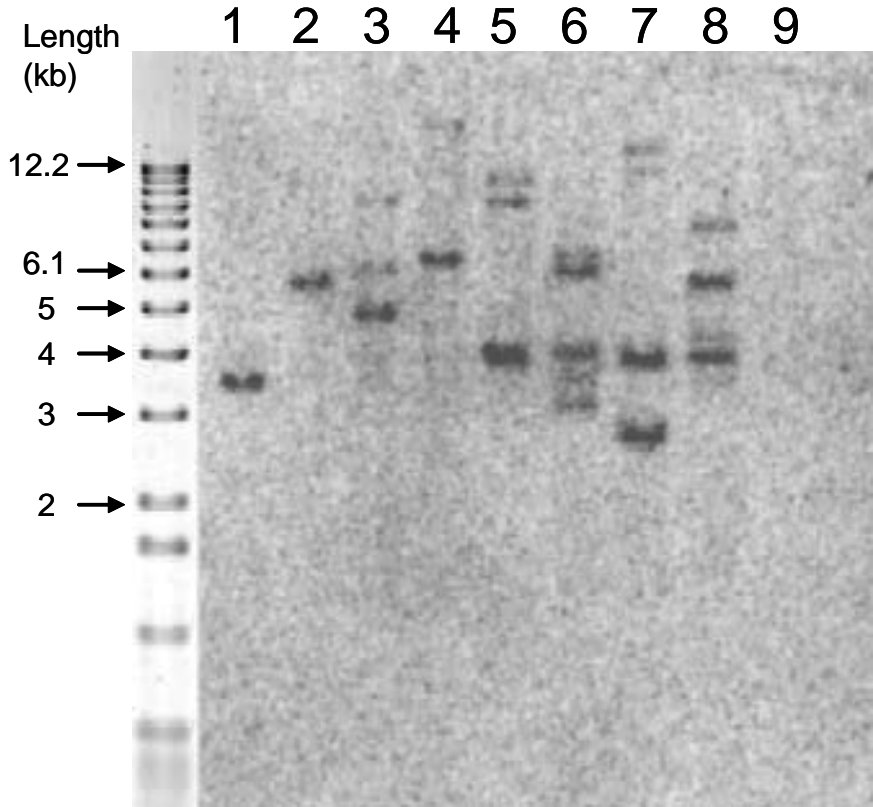

Length  
(kb)

1 2 3 4 5 6 7 8 9

12.2 →

6.1 →

5 →

4 →

3 →

2 →
